# Supplementary material for: Comparison of Genetic Profiles and Prognosis of High-Grade Gliomas Using Quantitative and Qualitative MRI Features: A Focus on G3 Gliomas
Source: PubMed Central journal article supplement — Korean J Radiol. 2020 Sep 10;22(2):233–42. doi: 10.3348/kjr.2020.0011 (PMC7817637; doi:10.3348/kjr.2020.0011), 2020-09-10
Supplement: kjr-22-233-s003.pdf [file kjr-22-233-s003.pdf]

**Supplementary Table 2. Imaging Parameter Descriptions**

| Imaging Parameter      | Description                                                                                         |
|------------------------|-----------------------------------------------------------------------------------------------------|
| <b>Volume</b>          |                                                                                                     |
| T2 volume              | Hyperintensity on the T2WI including cystic or necrotic region and contrast enhancing region volume |
| <b>CBV</b>             |                                                                                                     |
| CBV_mean               | Mean nCBV of the entire tumor volume on T2WI                                                        |
| CBV_95                 | 95th percentile nCBV of the entire tumor volume on T2WI                                             |
| CBV_90                 | 90th percentile nCBV of the entire tumor volume on T2WI                                             |
| CBV_85                 | 85th percentile nCBV of the entire tumor volume on T2WI                                             |
| <b>CBF</b>             |                                                                                                     |
| CBF_mean               | Mean nCBF of the entire tumor volume on T2WI                                                        |
| CBF_95                 | 95th percentile nCBF of the entire tumor volume on T2WI                                             |
| CBF_90                 | 90th percentile nCBF of the entire tumor volume on T2WI                                             |
| CBF_85                 | 85th percentile nCBF of the entire tumor volume on T2WI                                             |
| <b>ADC</b>             |                                                                                                     |
| ADC_mean               | Mean nADC of the entire tumor volume on T2WI                                                        |
| ADC_5                  | 5th percentile nADC of the entire tumor volume on T2WI                                              |
| ADC_10                 | 10th percentile nADC of the entire tumor volume on T2WI                                             |
| ADC_15                 | 15th percentile nADC of the entire tumor volume on T2WI                                             |
| <b>Location</b>        |                                                                                                     |
| Insula                 | Presence of tumor involvement of insula                                                             |
| Frontal                | Presence of tumor involvement of frontal lobe                                                       |
| Parietal               | Presence of tumor involvement of parietal lobe                                                      |
| Temporal               | Presence of tumor involvement of temporal lobe                                                      |
| Occipital              | Presence of tumor involvement of occipital lobe                                                     |
| Deep-gray              | Presence of tumor involvement of basal ganglia and thalamus                                         |
| Enhancement            | Presence of solid enhancing portion on the CE T1WI                                                  |
| Cystic change/necrosis | Presence of a necrotic or cystic portion                                                            |
| HSIM                   | Proportion of well-defined margin                                                                   |
| T2-FLAIR mismatch      | High signal intensity of the tumor on T2WI and a relatively low signal intensity on FLAIR           |

ADC = apparent diffusion coefficient, CBF = cerebral blood flow, CBV = cerebral blood volume, CE T1WI = contrast-enhanced T1-weighted image, FLAIR = fluid attenuated inversion recovery, HSIM = T2 hypersignal intensity margin, nADC = normalized ADC, nCBF = normalized CBF, nCBV = normalized CBV, T2WI = T2-weighted image
