# Supplementary material for: Comparison of Genetic Profiles and Prognosis of High-Grade Gliomas Using Quantitative and Qualitative MRI Features: A Focus on G3 Gliomas
Source: PubMed Central journal article supplement — Korean J Radiol. 2020 Sep 10;22(2):233–42. doi: 10.3348/kjr.2020.0011 (PMC7817637; doi:10.3348/kjr.2020.0011), 2020-09-10
Supplement: kjr-22-233-s004.pdf [file kjr-22-233-s004.pdf]

**Supplementary Table 3. Qualitative MRI Features according to Histologic Classification and Genetic Profiles**

|                    | Enhancement |        |          | Necrosis |        |          |
|--------------------|-------------|--------|----------|----------|--------|----------|
|                    | Present     | Absent | <i>P</i> | Present  | Absent | <i>P</i> |
| IDHmut             | 18          | 29     | 0.789    | 26       | 21     | 0.008    |
| IDHwt              | 12          | 17     |          | 7        | 22     |          |
| IDHmut1p/19qdel    | 12          | 7      | 0.004    | 12       | 7      | 0.373    |
| IDHmut1p/19qnondel | 6           | 22     |          | 14       | 14     |          |

*IDH* = isocitrate dehydrogenase, IDHmut = *IDH* mutation, IDHwt = *IDH* wildtype, IDHmut1p/19qdel = *IDH* mutation, 1p/19q-codeleted, IDHmut1p/19qnondel = *IDH* mutation, 1p/19q-nondeleted
